# Supplementary material
Source: Springer Nature journal article supplement (https://www.springermedizin.de/resource/supplementary/12889_2008_1166_MOESM4_ESM.pdf/9502600)
Supplement: MOESM4 [file 9502600]

***Iodine Module***  
**Objectives:** To obtain data on iodine supply in children and adolescents, to identify risk groups with iodine deficiencies, to assess determinants of iodine supply.  
**Population:** All KiGGS participants, aged 6+ years, about 12 000 individuals.

***Nutrition Module (EsKiMo)***  
**Objectives:** To obtain data on food consumption and nutrition behaviour in children and adolescents.  
**Population:** Subsample of KiGGS participants, aged 6-17 years, 2506 individuals.

***Mental Health Module (BELLA)***  
**Objectives:** To obtain data on mental health problems in children and adolescents, to identify determinants of mental health in different phases of development.  
**Population:** Subsample of KiGGS participants, aged 7-17 years, 2863 individuals.

***KiGGS Core Survey***  
**Objectives:**  
To obtain main indicators of physical and mental health, risk factors, health service utilisation, health-relevant behaviour and living conditions in children and adolescents.  
**Population:**  
Representative sample of 17 641 children and adolescents (8656 girls, 8985 boys), aged 0-17 years, in 167 communities.

***State Module "Schleswig-Holstein"***  
**Objectives:** To obtain representative health-related data on state level.  
**Population:** Additional sample of 1730 children and adolescents, aged 11-17 years, in another 18 communities in the state of Schleswig-Holstein.

***Motor Activity Module (MoMo)***  
**Objectives:** To assess motor fitness and physical activity in children and adolescents, to compare results with existing reference values, to calculate new reference values, to appraise differences and developments.  
**Population:** Subsample of KiGGS participants, aged 4-17 years, 4529 individuals.

***Environmental Module (KUS)***  
**Objectives:** To identify and quantify environmental determinants of health in children and adolescents.  
**Population:** Subsample of KiGGS participants, aged 3-14 years, 1790 individuals.
